# Supplementary material for: Novel Compound Heterozygous Mutations of TGM1 Gene Identified in a Turkish Collodion Baby Diagnosed with Non-Bullous Congenital Ichthyosiform Erythroderma
Source: PubMed Central journal article supplement — Ann Dermatol. 2023 Oct 31;35(Suppl 2):S234–8. doi: 10.5021/ad.21.134 (PMC10727856; doi:10.5021/ad.21.134), 2023-10-31
Supplement: ad-35-S234-s001.pdf [file ad-35-S234-s001.pdf]

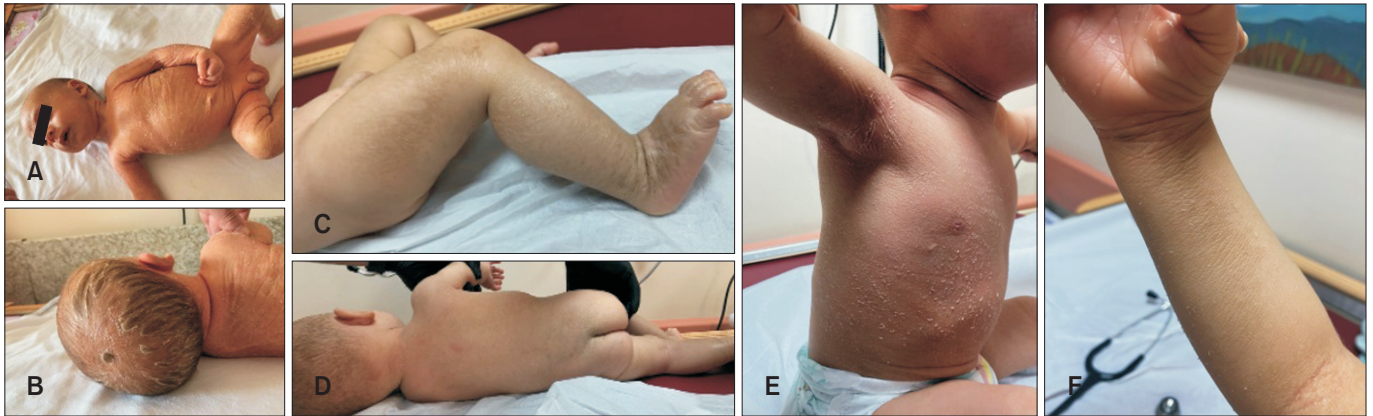

**Supplementary Fig. 1.** (A) Fine, white scales, erythroderma, and eclabium are observed on the body, extremities, and full face. Thin scales are white to light grey on the extremities, forehead, ears, neck at 3rd months. (B) Light Brown and platelike scales on the vertex of the scalp at 3rd months. (C) Thin scales are white to gray and beige on the inguinal area, extremities, and hyper-linearly of the toes at 6th months. (D) Thin scales are white on the whole back, body, neck, and head, with mild erythroderma on the neck and head and alopecia. (E) Dry, scaly skin and erythroderma on the trunk, axillar region, neck, and extremities at 1st year follow-up. (F) Dry, scaly skin on the arm and palms at 18th months follow-up.
